# Supplementary material for: Functional Analysis of Cancer-Associated DNA Polymerase ε Variants in Saccharomyces cerevisiae
Source: PubMed Central journal article supplement (PMC5844290; doi:10.1534/g3.118.200042), 2018-01-19
Supplement: 1019FileS1.pdf [file 1019FileS1.pdf]

SUPPLEMENTARY MATERIAL

**Functional analysis of cancer-associated DNA polymerase  $\epsilon$  variants in  
*Saccharomyces cerevisiae***

Stephanie R. Barbari, Daniel P. Kane<sup>1</sup>, Elizabeth A. Moore and Polina V. Shcherbakova

Eppley Institute for Research in Cancer and Allied Diseases, Fred & Pamela Buffett Cancer  
Center, University of Nebraska Medical Center, Omaha, NE 68198, USA

<sup>1</sup> *Present address:* Daniel P. Kane, Department of Biological and Environmental Sciences, Le  
Moyne College, Syracuse, NY 13214

**Table S1 Genotypes of yeast strains used for construction of *pol2-x* mutants and mutation rate measurements**

| Strain                 | Relevant chromosomal mutation | Genotype                                                                                             |
|------------------------|-------------------------------|------------------------------------------------------------------------------------------------------|
| <b>Haploid strains</b> |                               |                                                                                                      |
| TM30                   | WT                            | <i>MATa ade5-1 lys2-Tn5-13 trp1-289 his7-2 leu2-3,112 ura3-4 CAN1::LEU2</i>                          |
| TM44                   | WT                            | <i>MATα ade5-1 lys2-InsE<sub>A14</sub> trp1-289 his7-2 leu2-3,112 ura3-52 can1Δ::loxP</i>            |
| DK039a/DK039b          | <i>pol2-F139L</i>             | <i>MATa ade5-1 lys2-InsE<sub>A14</sub> trp1-289 his7-2 leu2-3,112 ura3-X CAN1::LEU2 pol2-F139L</i>   |
| SB042/SB044            | <i>pol2-R252H</i>             | <i>MATa ade5-1 lys2-Tn5-13 trp1-289 his7-2 leu2-3,112 ura3-4 CAN1::LEU2 pol2-R252H</i>               |
| SB046/SB051            | <i>pol2-R252H</i>             | <i>MATα ade5-1 lys2-InsE<sub>A14</sub> trp1-289 his7-2 leu2-3,112 ura3-52 can1Δ::loxP pol2-R252H</i> |
| SI022/SI023            | <i>pol2-D290V</i>             | <i>MATa ade5-1 lys2-Tn5-13 trp1-289 his7-2 leu2-3,112 ura3-4 CAN1::LEU2 pol2-D290V</i>               |
| SI024/SI026            | <i>pol2-D290V</i>             | <i>MATα ade5-1 lys2-InsE<sub>A14</sub> trp1-289 his7-2 leu2-3,112 ura3-52 can1Δ::loxP pol2-D290V</i> |
| DK046/DK047            | <i>pol2-P301H</i>             | <i>MATα ade5-1 lys2-InsE<sub>A14</sub> trp1-289 his7-2 leu2-3,112 ura3-X CAN1::LEU2 pol2-P301H</i>   |
| SB112/SB113            | <i>pol2-P301H</i>             | <i>MATa ade5-1 lys2-InsE<sub>A14</sub> trp1-289 his7-2 leu2-3,112 ura3-X can1Δ::loxP pol2-P301H</i>  |
| DK048                  | <i>pol2-F382S</i>             | <i>MATα ade5-1 lys2-Tn5-13 trp1-289 his7-2 leu2-3,112 ura3-X can1Δ::loxP pol2-F382S</i>              |
| DK049/DK050            | <i>pol2-F382S</i>             | <i>MATa ade5-1 lys2-InsE<sub>A14</sub> trp1-289 his7-2 leu2-3,112 ura3-X CAN1::LEU2 pol2-F382S</i>   |
| SB052/SB053            | <i>pol2-V426L</i>             | <i>MATα ade5-1 lys2-InsE<sub>A14</sub> trp1-289 his7-2 leu2-3,112 ura3-52 can1Δ::loxP pol2-V426L</i> |
| SB054/SB055            | <i>pol2-V426L</i>             | <i>MATα ade5-1 lys2-InsE<sub>A14</sub> trp1-289 his7-2 leu2-3,112 ura3-52 can1Δ::loxP pol2-V426L</i> |
| SI030/SI031            | <i>pol2-L439V</i>             | <i>MATa ade5-1 lys2-Tn5-13 trp1-289 his7-2 leu2-3,112 ura3-4 CAN1::LEU2 pol2-L439V</i>               |
| SI032/SI033            | <i>pol2-L439V</i>             | <i>MATα ade5-1 lys2-InsE<sub>A14</sub> trp1-289 his7-2 leu2-3,112 ura3-52 can1Δ::loxP pol2-L439V</i> |
| SB063/SB065            | <i>pol2-P451R</i>             | <i>MATa ade5-1 lys2-Tn5-13 trp1-289 his7-2 leu2-3,112 ura3-4 CAN1::LEU2 pol2-P451R</i>               |
| SB066/SB068            | <i>pol2-P451R</i>             | <i>MATα ade5-1 lys2-InsE<sub>A14</sub> trp1-289 his7-2 leu2-3,112 ura3-52 can1Δ::loxP pol2-P451R</i> |
| SB069/SB071            | <i>pol2-S474F</i>             | <i>MATa ade5-1 lys2-Tn5-13 trp1-289 his7-2 leu2-3,112 ura3-4 CAN1::LEU2 pol2-S474F</i>               |
| SB073/SB074            | <i>pol2-S474F</i>             | <i>MATα ade5-1 lys2-InsE<sub>A14</sub> trp1-289 his7-2 leu2-3,112 ura3-52 can1Δ::loxP pol2-S474F</i> |

**Table S1 Genotypes of yeast strains used for construction of *pol2-x* mutants and mutation rate measurements (Continued)**

| Strain                      | Relevant chromosomal mutation | Genotype                                                                                                                                                                       |
|-----------------------------|-------------------------------|--------------------------------------------------------------------------------------------------------------------------------------------------------------------------------|
| DK051a/DK051b               | <i>pol2-R778W</i>             | <i>MATα ade5-1 lys2-InsE<sub>A14</sub> trp1-289 his7-2 leu2-3,112 ura3-X CAN1::LEU2 pol2-R778W</i>                                                                             |
| SB075/SB077                 | <i>pol2-A979V</i>             | <i>MATα ade5-1 lys2-Tn5-13 trp1-289 his7-2 leu2-3,112 ura3-4 CAN1::LEU2 pol2-A979V</i>                                                                                         |
| SB079/SB081                 | <i>pol2-A979V</i>             | <i>MATα ade5-1 lys2-InsE<sub>A14</sub> trp1-289 his7-2 leu2-3,112 ura3-52 can1Δ::loxP pol2-A979V</i>                                                                           |
| DK055a/DK055b               | <i>pol2-D1757N</i>            | <i>MATα ade5-1 lys2-InsE<sub>A14</sub> trp1-289 his7-2 leu2-3,112 ura3-X CAN1::LEU2 pol2-D1757N</i>                                                                            |
| SB083/SB084                 | <i>mlh1Δ</i>                  | <i>MATα ade5-1 lys2-Tn5-13 trp1-289 his7-2 leu2-3,112 ura3-4 CAN1::LEU2 mlh1Δ::hphMX4</i>                                                                                      |
| SB086/SB087                 | <i>mlh1Δ</i>                  | <i>MATα ade5-1 lys2-InsE<sub>A14</sub> trp1-289 his7-2 leu2-3,112 ura3-52 can1Δ::loxP mlh1Δ::hphMX4</i>                                                                        |
| SB088/SB089/<br>SB090/SB091 | <i>pol2-R252H mlh1Δ</i>       | <i>MATα ade5-1 lys2-Tn5-13 trp1-289 his7-2 leu2-3,112 ura3-4 CAN1::LEU2 pol2-R252H mlh1Δ::hphMX4</i>                                                                           |
| SB092/SB093/<br>SB094       | <i>pol2-R252H mlh1Δ</i>       | <i>MATα ade5-1 lys2-InsE<sub>A14</sub> trp1-289 his7-2 leu2-3,112 ura3-52 can1Δ::loxP pol2-R252H mlh1Δ::hphMX4</i>                                                             |
| SI003/SI004/<br>SI005/SI006 | <i>pol2-R778W mlh1Δ</i>       | <i>MATα ade5-1 lys2-InsE<sub>A14</sub> trp1-289 his7-2 leu2-3,112 ura3-X CAN1::LEU2 pol2-R778W mlh1Δ::hphMX4</i>                                                               |
| SB095/SB096/<br>SB097/SB098 | <i>pol2-A979V mlh1Δ</i>       | <i>MATα ade5-1 lys2-Tn5-13 trp1-289 his7-2 leu2-3,112 ura3-4 CAN1::LEU2 pol2-A979V mlh1Δ::hphMX4</i>                                                                           |
| SB099/SB100/<br>SB101/SB102 | <i>pol2-A979V mlh1Δ</i>       | <i>MATα ade5-1 lys2-InsE<sub>A14</sub> trp1-289 his7-2 leu2-3,112 ura3-52 can1Δ::loxP pol2-A979V mlh1Δ::hphMX4</i>                                                             |
| <b>Diploid strains</b>      |                               |                                                                                                                                                                                |
| TM63/SB539/<br>SB540        | WT                            | <i>MATα/MATα ade5-1/ade5-1 lys2-Tn5-13/lys2-InsE<sub>A14</sub> trp1-289/trp1-289 his7-2/his7-2 leu2-3,112/leu2-3,112 ura3-4/ura3-52 CAN1::LEU2/can1Δ::loxP</i>                 |
| SB555/SB556                 | <i>pol2-R252H/POL2</i>        | <i>MATα/MATα ade5-1/ade5-1 lys2-Tn5-13/lys2-InsE<sub>A14</sub> trp1-289/trp1-289 his7-2/his7-2 leu2-3,112/leu2-3,112 ura3-4/ura3-52 CAN1::LEU2/can1Δ::loxP pol2-R252H/POL2</i> |
| SI531/SI533                 | <i>pol2-D290V/POL2</i>        | <i>MATα/MATα ade5-1/ade5-1 lys2-Tn5-13/lys2-InsE<sub>A14</sub> trp1-289/trp1-289 his7-2/his7-2 leu2-3,112/leu2-3,112 ura3-4/ura3-52 CAN1::LEU2/can1Δ::loxP pol2-D290V/POL2</i> |

**Table S1 Genotypes of yeast strains used for construction of *pol2-x* mutants and mutation rate measurements (Continued)**

| Strain                      | Relevant chromosomal mutation                          | Genotype                                                                                                                                                                                                       |
|-----------------------------|--------------------------------------------------------|----------------------------------------------------------------------------------------------------------------------------------------------------------------------------------------------------------------|
| SI527/SI528/<br>SI529/SI530 | <i>pol2-D290V/pol2-D290V</i>                           | <i>MATa/MATα ade5-1/ade5-1 lys2-Tn5-13/lys2-InsE<sub>A14</sub> trp1-289/trp1-289 his7-2/his7-2 leu2-3,112/leu2-3,112 ura3-4/ura3-52 CAN1::LEU2/can1Δ::loxP pol2-D290V/pol2-D290V</i>                           |
| SI505/SI507                 | <i>pol2-P301H/POL2</i>                                 | <i>MATa/MATα ade5-1/ade5-1 lys2-InsE<sub>A14</sub>/lys2-InsE<sub>A14</sub> trp1-289/trp1-289 his7-2/his7-2 leu2-3,112/leu2-3,112 ura3-X/ura3-X CAN1::LEU2/can1Δ::loxP pol2-P301H/POL2</i>                      |
| SB557/SB558/<br>SB559       | <i>pol2-P301H/pol2-P301H</i>                           | <i>MATa/MATα ade5-1/ade5-1 lys2::InsE<sub>A14</sub>/lys2::InsE<sub>A14</sub> trp1-289/trp1-289 his7-2/his7-2 leu2-3,112/leu2-3,112 ura3-X/ura3-X CAN1::LEU2/can1Δ::loxP pol2-P301H/pol2-P301H</i>              |
| SI509/SI511                 | <i>pol2-F382S/POL2</i>                                 | <i>MATa/MATα ade5-1/ade5-1 lys2-InsE<sub>A14</sub>/lys2-InsE<sub>A14</sub> trp1-289/trp1-289 his7-2/his7-2 leu2-3,112/leu2-3,112 ura3-X/ura3-52 CAN1::LEU2/can1Δ::loxP pol2-F382S/POL2</i>                     |
| SI514/SI516                 | <i>pol2-F382S/pol2-F382S</i>                           | <i>MATa/MATα ade5-1/ade5-1 lys2-InsE<sub>A14</sub>/lys2-Tn5-13 trp1-289/trp1-289 his7-2/his7-2 leu2-3,112/leu2-3,112 ura3-X/ura3-X CAN1::LEU2/can1Δ::loxP pol2-F382S/pol2-F382S</i>                            |
| SI522/SI526                 | <i>pol2-L439V/POL2</i>                                 | <i>MATa/MATα ade5-1/ade5-1 lys2-Tn5-13/lys2-InsE<sub>A14</sub> trp1-289/trp1-289 his7-2/his7-2 leu2-3,112/leu2-3,112 ura3-4/ura3-52 CAN1::LEU2/can1Δ::loxP pol2-L439V/POL2</i>                                 |
| SI518/SI519/<br>SI520/SI521 | <i>pol2-L439V/pol2-L439V</i>                           | <i>MATa/MATα ade5-1/ade5-1 lys2-Tn5-13/lys2-InsE<sub>A14</sub> trp1-289/trp1-289 his7-2/his7-2 leu2-3,112/leu2-3,112 ura3-4/ura3-52 CAN1::LEU2/can1Δ::loxP pol2-L439V/pol2-L439V</i>                           |
| SB542/SB545                 | <i>pol2-P451R/POL2</i>                                 | <i>MATa/MATα ade5-1/ade5-1 lys2-Tn5-13/lys2-InsE<sub>A14</sub> trp1-289/trp1-289 his7-2/his7-2 leu2-3,112/leu2-3,112 ura3-4/ura3-52 CAN1::LEU2/can1Δ::loxP pol2-P451R/POL2</i>                                 |
| SB547/SB548                 | <i>pol2-P451R/pol2-P451R</i>                           | <i>MATa/MATα ade5-1/ade5-1 lys2-Tn5-13/lys2-InsE<sub>A14</sub> trp1-289/trp1-289 his7-2/his7-2 leu2-3,112/leu2-3,112 ura3-4/ura3-52 CAN1::LEU2/can1Δ::loxP pol2-P451R/pol2-P451R</i>                           |
| SB549/SB551                 | <i>pol2-S474F/POL2</i>                                 | <i>MATa/MATα ade5-1/ade5-1 lys2-Tn5-13/lys2-InsE<sub>A14</sub> trp1-289/trp1-289 his7-2/his7-2 leu2-3,112/leu2-3,112 ura3-4/ura3-52 CAN1::LEU2/can1Δ::loxP pol2-S474F/POL2</i>                                 |
| SB552/SB553                 | <i>pol2-S474F/pol2-S474F</i>                           | <i>MATa/MATα ade5-1/ade5-1 lys2-Tn5-13/lys2-InsE<sub>A14</sub> trp1-289/trp1-289 his7-2/his7-2 leu2-3,112/leu2-3,112 ura3-4/ura3-52 CAN1::LEU2/can1Δ::loxP pol2-S474F/pol2-S474F</i>                           |
| SB560/SB561                 | <i>mlh1Δ::hphMX4/mlh1Δ::hphMX4</i>                     | <i>MATa/MATα ade5-1/ade5-1 lys2-Tn5-13/lys2-InsE<sub>A14</sub> trp1-289/trp1-289 his7-2/his7-2 leu2-3,112/leu2-3,112 ura3-4/ura3-52 CAN1::LEU2/can1Δ::loxP mlh1Δ::hphMX4/mlh1Δ::hphMX4</i>                     |
| SB562/SB563                 | <i>pol2-R252H/POL2<br/>mlh1Δ::hphMX4/mlh1Δ::hphMX4</i> | <i>MATa/MATα ade5-1/ade5-1 lys2-Tn5-13/lys2-InsE<sub>A14</sub> trp1-289/trp1-289 his7-2/his7-2 leu2-3,112/leu2-3,112 ura3-4/ura3-52 CAN1::LEU2/can1Δ::loxP pol2-R252H/POL2<br/>mlh1Δ::hphMX4/mlh1Δ::hphMX4</i> |

**Table S2 Plasmid, restriction site, and method used to construct *pol2* mutants**

| Human POLE variant | Yeast Pol2 mimic | Plasmid | Restriction site | Mutation in truncated or full-length <i>POL2</i> after integration | Construction method <sup>a</sup> |
|--------------------|------------------|---------|------------------|--------------------------------------------------------------------|----------------------------------|
| F104L              | F139L            | YIpDK1  | <i>Bam</i> HI    | Full-length                                                        | 1                                |
| R231H              | R252H            | YIpDK1  | <i>Bgl</i> II    | Truncated                                                          | 2                                |
| D275V              | D290V            | YIpDK1  | <i>Bam</i> HI    | Full-length                                                        | 1                                |
| P286H              | P301H            | YIpDK1  | <i>Bam</i> HI    | Full-length                                                        | 1                                |
| N336S              | N351S            | YIpDK1  | <i>Bam</i> HI    | Full-length                                                        | 1                                |
| F367S              | F382S            | YIpDK1  | <i>Bam</i> HI    | Full-length                                                        | 1                                |
| V411L              | V426L            | YIpDK1  | <i>Bgl</i> II    | Truncated                                                          | 2                                |
| L424V              | L439V            | YIpDK1  | <i>Bam</i> HI    | Full-length                                                        | 1                                |
| P436R              | P451R            | YIpDK1  | <i>Bgl</i> II    | Truncated                                                          | 2                                |
| S459F              | S474F            | YIpDK1  | <i>Bgl</i> II    | Truncated                                                          | 2                                |
| R762W              | R778W            | p173    | <i>Age</i> I     | Full-length                                                        | 1                                |
| A966V              | A979V            | p173    | <i>Bsr</i> GI    | Truncated                                                          | 2                                |
| D1752N             | D1757N           | p174    | <i>Age</i> I     | Full-length                                                        | 1                                |

<sup>a</sup>Refers to the two methods described in the Materials and Methods section.

**Table S3 Spontaneous mutation rates in haploid yeast strains with *pol2* mutations mimicking human *POLE* variants**

| Human<br>POLE<br>variant | Yeast <i>POL2</i><br>allele | Can <sup>R</sup> mutation                          |                  | His <sup>+</sup> reversion                         |                  | Lys <sup>+</sup> reversion                         |                  |
|--------------------------|-----------------------------|----------------------------------------------------|------------------|----------------------------------------------------|------------------|----------------------------------------------------|------------------|
|                          |                             | Mutation<br>rate (x10 <sup>-8</sup> ) <sup>a</sup> | Fold<br>increase | Mutation<br>rate (x10 <sup>-8</sup> ) <sup>a</sup> | Fold<br>increase | Mutation<br>rate (x10 <sup>-8</sup> ) <sup>a</sup> | Fold<br>increase |
| WT                       | <i>POL2</i>                 | 23 (17-32)                                         | 1.0              | 1.3 (0.76-1.9)                                     | 1.0              | 31 (25-49)                                         | 1.0              |
| F104L                    | <i>pol2-F139L</i>           | 21 (18-23)                                         | 0.91             | 1.2 (0.94-1.5)                                     | 0.92             | 26 (24-34)                                         | 0.84             |
| R231H                    | <i>pol2-R252H</i>           | 18 (16-21)                                         | 0.78             | 0.78 (0.58-0.95)                                   | 0.60             | 36 (33-46)                                         | 1.2              |
| D275V                    | <i>pol2-D290V</i>           | <b>53 (44-55)</b>                                  | <b>2.3</b>       | <b>4.9 (4.2-5.9)</b>                               | <b>3.8</b>       | <b>42 (36-44)</b>                                  | <b>1.4</b>       |
| P286H                    | <i>pol2-P301H</i>           | <b>290 (250-440)</b>                               | <b>13</b>        | <b>29 (25-37)</b>                                  | <b>22</b>        | <b>51 (40-63)</b>                                  | <b>1.6</b>       |
| N336S                    | <i>pol2-N351S</i>           | 21 (19-25)                                         | 0.91             | 1.6 (1.3-2.4)                                      | 1.2              | 32 (30-36)                                         | 1.0              |
| F367S                    | <i>pol2-F382S</i>           | <b>380 (300-490)</b>                               | <b>17</b>        | <b>16 (8.7-22)</b>                                 | <b>12</b>        | 56 (30-140)                                        | 1.8              |
| V411L                    | <i>pol2-V426L</i>           | 28 (25-32)                                         | 1.2              | <b>2.4 (2.0-3.3)</b>                               | <b>1.8</b>       | 30 (28-35)                                         | 0.97             |
| L424V                    | <i>pol2-L439V</i>           | <b>120 (82-140)</b>                                | <b>5.2</b>       | <b>11 (9.6-16)</b>                                 | <b>8.5</b>       | 32 (27-36)                                         | 1.0              |
| P436R                    | <i>pol2-P451R</i>           | <b>120 (98-150)</b>                                | <b>5.2</b>       | <b>12 (11-16)</b>                                  | <b>9.2</b>       | <b>40 (36-49)</b>                                  | <b>1.3</b>       |
| S459F                    | <i>pol2-S474F</i>           | <b>680 (560-800)</b>                               | <b>30</b>        | <b>35 (30-47)</b>                                  | <b>27</b>        | <b>71 (62-87)</b>                                  | <b>2.3</b>       |
| R762W                    | <i>pol2-R778W</i>           | 21 (17-25)                                         | 0.91             | 1.0 (0.59-1.6)                                     | 0.77             | 26 (22-29)                                         | 0.84             |
| A969V                    | <i>pol2-A979V</i>           | 21 (19-28)                                         | 0.91             | 1.4 (0.87-1.7)                                     | 1.1              | 31 (27-34)                                         | 1.0              |
| D1752N                   | <i>pol2-D1757N</i>          | 21 (15-32)                                         | 0.91             | 1.0 (0.78-1.4)                                     | 0.77             | 22 (20-27)                                         | 0.71             |

<sup>a</sup>Mutation rates are given as the median of at least 18 independent cultures, with 95% confidence intervals in parentheses. Fold increase is shown relative to the wild-type haploid (WT). Bold text indicates  $p < 0.05$  by Wilcoxon-Mann-Whitney compared to WT. Data from this table were used to generate Figure 2.

**Table S4 Summary of published tumor sequencing data used to calculate the frequency of DNA binding cleft variants**

| Human <i>POLE</i> variant | Exon | No. times reported <sup>a</sup> | No. tumors analyzed <sup>b</sup> | Incidence per 10,000 tumors |
|---------------------------|------|---------------------------------|----------------------------------|-----------------------------|
| D275V                     | 9    | 1                               | 13,283                           | 0.75                        |
| P286H                     | 9    | 1                               | 13,283                           | 0.75                        |
| P286R                     | 9    | 160                             | 13,159                           | 120                         |
| F367S                     | 11   | 5                               | 7,079                            | 7.1                         |
| L424V                     | 13   | 3                               | 13,424                           | 2.2                         |
| P436R                     | 13   | 6                               | 13,424                           | 4.5                         |
| S459F                     | 14   | 18                              | 11,831                           | 15                          |

<sup>a</sup>Number of times the variant has been reported in sporadic CRC and EC.

<sup>b</sup>Total number of tumors from studies where the corresponding exon was sequenced.

## References

Ahn SM, Ansari AA, Kim J, Kim D, Chun SM, Kim TW, *et al.* The somatic *POLE* P286R mutation defines a unique subclass of colorectal cancer featuring hypermutation, representing a potential genomic biomarker for immunotherapy. *Oncotarget* 2016; 7: 68638-68649.

Bellone S, Centritto F, Black J, Schwab C, English D, Cocco E, *et al.* Polymerase  $\epsilon$  (*POLE*) ultra-mutated tumors induce robust tumor-specific CD4<sup>+</sup> T cell responses in endometrial cancer patients. *Gynecol Oncol* 2015; 138: 11-17.

Billingsley CC, Cohn DE, Mutch DG, Stephens JA, Suarez AA, and Goodfellow PJ. Polymerase  $\epsilon$  (*POLE*) mutations in endometrial cancer: clinical outcomes and implications for Lynch syndrome testing. *Cancer* 2015; 121: 386-394.

Cancer Genome Atlas Network. Comprehensive molecular characterization of human colon and rectal cancer. *Nature* 2012; 487: 330-337.

Cancer Genome Atlas Network. Integrated genomic characterization of endometrial carcinoma. *Nature* 2013; 497: 67-73.

Church DN, Briggs SE, Palles C, Domingo E, Kearsey SJ, Grimes JM, *et al.* DNA polymerase  $\epsilon$  and  $\delta$  exonuclease domain mutations in endometrial cancer. *Hum Mol Genet* 2013; 22: 2820-2828.

Church DN, Stelloo E, Nout RA, Valtcheva N, Depreeuw J, ter Haar N, *et al.* Prognostic significance of *POLE* proofreading mutations in endometrial cancer. *J Natl Cancer Inst* 2015; 107: 402.

Domingo E, Freeman-Mills L, Rayner E, Glaire M, Briggs S, Vermeulen L, *et al.* Somatic *POLE* proofreading domain mutation, immune response, and prognosis in colorectal cancer: a retrospective, pooled biomarker study. *Lancet Gastroenterol Hepatol* 2016; 1: 207-216.

Espinosa I, D'Angelo E, Palacios J, and Prat J. Mixed and ambiguous endometrial carcinomas: A heterogeneous group of tumors with different clinicopathologic and molecular genetic features. *Am J Surg Pathol* 2016; 40: 972-981.

Espinosa I, Lee CH, D'Angelo E, Palacios J, and Prat J. Undifferentiated and dedifferentiated endometrial carcinomas with pole exonuclease domain mutations have a favorable prognosis. *Am J Surg Pathol* 2017; 41: 1121-1128.

Giannakis M, Mu XJ, Shukla SA, Qian ZR, Cohen O, Nishihara R, *et al.* Genomic correlates of immune-cell infiltrates in colorectal carcinoma. *Cell Rep* 2016; 17: 1206.

Grossman RL, Heath AP, Ferretti V, Varmus HE, Lowy DR, Kibbe WA, et al. Toward a shared vision for cancer genomic data. *N Engl J Med* 2016; 375: 1109-1112; <https://portal.gdc.cancer.gov/> [Last accessed 11/10/17].

Jesinghaus M, Pfarr N, Endris V, Kloor M, Volckmar AL, Brandt R, et al. Genotyping of colorectal cancer for cancer precision medicine: Results from the IPH Center for Molecular Pathology. *Genes Chromosomes Cancer* 2016; 55: 505-521.

Kane DP and Shcherbakova PV. A common cancer-associated DNA polymerase  $\epsilon$  mutation causes an exceptionally strong mutator phenotype, indicating fidelity defects distinct from loss of proofreading. *Cancer Res* 2014; 74: 1895-1901.

Köbel M, Meng B, Hoang LN, Almadani N, Li X, Soslow RA, et al. Molecular analysis of mixed endometrial carcinomas shows clonality in most cases. *Am J Surg Pathol* 2016; 40: 166-180.

Kothari N, Teer JK, Abbott AM, Srikumar T, Zhang Y, Yoder SJ, et al. Increased incidence of *FBXW7* and *POLE* proofreading domain mutations in young adult colorectal cancers. *Cancer* 2016; 122: 2828-2835.

Le Gallo M, O'Hara AJ, Rudd ML, Urick ME, Hansen NF, O'Neil NJ, et al. Exome sequencing of serous endometrial tumors identifies recurrent somatic mutations in chromatin-remodeling and ubiquitin ligase complex genes. *Nat Genet* 2012; 44: 1310-1315.

McConechy MK, Talhouk A, Leung S, Chiu D, Yang W, Senz J, et al. Endometrial carcinomas with *POLE* exonuclease domain mutations have a favorable prognosis. *Clin Cancer Res* 2016; 22: 2865-2873.

Meng B, Hoang LN, McIntyre JB, Duggan MA, Nelson GS, Lee CH, et al. *POLE* exonuclease domain mutation predicts long progression-free survival in grade 3 endometrioid carcinoma of the endometrium. *Gynecol Oncol* 2014; 134: 15-19.

Nowak JA, Yurgelun MB, Bruce JL, Rojas-Rudilla V, Hall DL, Shivdasani P, et al. Detection of mismatch repair deficiency and microsatellite instability in colorectal adenocarcinoma by targeted next-generation sequencing. *J Mol Diagn* 2017; 19: 84-91

Rosa-Rosa JM, Leskelä S, Cristóbal-Lana E, Santón A, López-García MÁ, Muñoz G, et al. Molecular genetic heterogeneity in undifferentiated endometrial carcinomas. *Mod Pathol* 2016; 29: 1390-1398.

Seshagiri S, Stawiski EW, Durinck S, Modrusan Z, Storm EE, Conboy CB, et al. Recurrent R-spondin fusions in colon cancer. *Nature* 2012; 488: 660-664.

Shinbrot E, Henninger EE, Weinhold N, Covington KR, Schultz N, Chao H, et al. Exonuclease mutations in DNA polymerase  $\epsilon$  reveal replication strand specific mutation patterns and human origins of replication. *Genome Res* 2014; 24: 1740-1750.

Stadler ZK, Battaglin F, Middha S, Hechtman JF, Tran C, Cercek A, et al. Reliable detection of mismatch repair deficiency in colorectal cancers using mutational load in next-generation sequencing panels. *J Clin Oncol* 2016; 34: 2141-2147

Stenzinger A, Pfarr N, Endris V, Penzel R, Jansen L, Wolf T, et al. Mutations in *POLE* and survival of colorectal cancer patients--link to disease stage and treatment. *Cancer Med* 2014; 3: 1527-1538.

Talhouk A, McConechy MK, Leung S, Li-Chang HH, Kwon JS, Melnyk N, et al. A clinically applicable molecular-based classification for endometrial cancers. *Br J Cancer* 2015; 113: 299-310.

van de Wetering M, Francies HE, Francis JM, Bounova G, Iorio F, Pronk A, et al. Prospective derivation of a living organoid biobank of colorectal cancer patients. *Cell* 2015; 161: 933-945.

Wong A, Kuick CH, Wong WL, Tham JM, Mansor S, Loh E, et al. Mutation spectrum of *POLE* and *POLD1* mutations in South East Asian women presenting with grade 3 endometrioid endometrial carcinomas. *Gynecol Oncol* 2016; 141: 113-120.



Yoshida R, Miyashita K, Inoue M, Shimamoto A, Yan Z, Egashira A, *et al.* Concurrent genetic alterations in DNA polymerase proofreading and mismatch repair in human colorectal cancer. *Eur J Hum Genet* 2011; 19: 320-325.

Zehir A, Benayed R, Shah RH, Syed A, Middha S, Kim HR, *et al.* Mutational landscape of metastatic cancer revealed from prospective clinical sequencing of 10,000 patients. *Nat Med* 2017; 23: 703-713.

Zhao S, Choi M, Overton JD, Bellone S, Roque DM, Cocco E, *et al.* Landscape of somatic single-nucleotide and copy-number mutations in uterine serous carcinoma. *Proc Natl Acad Sci U S A* 2013; 110: 2916-2921.

**Table S5 P values (Fisher's exact test) for comparison of frequencies of individual *POLE* variants**

| POLE Variant | D275V             | P286H             | L424V             | P436R             | F367S             | S459F             |
|--------------|-------------------|-------------------|-------------------|-------------------|-------------------|-------------------|
| P286H        | 1                 |                   |                   |                   |                   |                   |
| L424V        | 0.62              | 0.62              |                   |                   |                   |                   |
| P436R        | 0.12              | 0.12              | 0.51              |                   |                   |                   |
| F367S        | <b>0.022</b>      | <b>0.022</b>      | 0.13              | 0.53              |                   |                   |
| S459F        | <b>&lt;0.0001</b> | <b>&lt;0.0001</b> | <b>0.0003</b>     | <b>0.0069</b>     | 0.14              |                   |
| P286R        | <b>&lt;0.0001</b> | <b>&lt;0.0001</b> | <b>&lt;0.0001</b> | <b>&lt;0.0001</b> | <b>&lt;0.0001</b> | <b>&lt;0.0001</b> |

Data used for analysis are in Supplementary Table S4. P values indicating statistically significant differences are in bold.

**Table S6 Spontaneous mutation rates in diploid yeast strains with *pol2* mutations mimicking human *POLE* variants**

| Human POLE variant | Yeast <i>POL2</i> alleles    | Can <sup>R</sup> mutation                       |               | His <sup>+</sup> reversion                      |               | Lys <sup>+</sup> reversion                      |                   |
|--------------------|------------------------------|-------------------------------------------------|---------------|-------------------------------------------------|---------------|-------------------------------------------------|-------------------|
|                    |                              | Mutation rate (x10 <sup>-8</sup> ) <sup>a</sup> | Fold increase | Mutation rate (x10 <sup>-8</sup> ) <sup>a</sup> | Fold increase | Mutation rate (x10 <sup>-8</sup> ) <sup>a</sup> | Fold increase     |
| WT                 | <i>POL2/POL2</i>             | 20 (15-24)                                      | 1.0           | 1.1 (0.70-1.7)                                  | 1.0           | 22 (17-26)                                      | 1.0               |
| D275V              | <i>pol2-D290V/POL2</i>       | 21 (19-23)                                      | 1.0           | <b>2.7 (2.0-3.1)</b>                            | <b>2.5</b>    | 16 (13-18)                                      | 0.73              |
|                    | <i>pol2-D290V/pol2-D290V</i> | <b>40 (37-43)</b>                               | <b>2.0</b>    | <b>5.3 (4.4-5.9)</b>                            | <b>4.8</b>    | 22 (19-28)                                      | 1.0               |
| P286H              | <i>pol2-P301H/POL2</i>       | <b>130 (110-150)</b>                            | <b>6.5</b>    | <b>10 (9.4-13)</b>                              | <b>9.1</b>    | 30 <sup>b</sup> (27-38)                         | 0.68 <sup>b</sup> |
|                    | <i>pol2-P301H/pol2-P301H</i> | <b>270 (240-280)</b>                            | <b>14</b>     | <b>24 (21-27)</b>                               | <b>22</b>     | 49 <sup>b</sup> (40-52)                         | 1.1 <sup>b</sup>  |
| F367S              | <i>pol2-F382S/POL2</i>       | <b>230 (190-310)</b>                            | <b>12</b>     | <b>24 (17-37)</b>                               | <b>22</b>     | 59 <sup>b</sup> (49-76)                         | 1.3 <sup>b</sup>  |
|                    | <i>pol2-F382S/pol2-F382S</i> | <b>530 (420-710)</b>                            | <b>27</b>     | <b>50 (32-69)</b>                               | <b>45</b>     | <b>66 (37-83)</b>                               | <b>3.0</b>        |
| L424V              | <i>pol2-L439V/POL2</i>       | <b>68 (53-82)</b>                               | <b>3.4</b>    | <b>5.1 (4.5-6.4)</b>                            | <b>4.6</b>    | 17 (16-22)                                      | 0.77              |
|                    | <i>pol2-L439V/pol2-L439V</i> | <b>120 (100-140)</b>                            | <b>6.0</b>    | <b>13 (11-15)</b>                               | <b>12</b>     | 20 (18-22)                                      | 0.91              |
| P436R              | <i>pol2-P451R/POL2</i>       | <b>82 (74-97)</b>                               | <b>4.1</b>    | <b>7.0 (6.5-9.6)</b>                            | <b>6.4</b>    | 20 (17-25)                                      | 0.91              |
|                    | <i>pol2-P451R/pol2-P451R</i> | <b>180 (150-200)</b>                            | <b>9.0</b>    | <b>16 (14-19)</b>                               | <b>15</b>     | 24 (21-31)                                      | 1.1               |
| S459F              | <i>pol2-S474F/POL2</i>       | <b>500 (370-640)</b>                            | <b>25</b>     | <b>27 (24-37)</b>                               | <b>25</b>     | <b>30 (26-31)</b>                               | <b>1.4</b>        |
|                    | <i>pol2-S474F/pol2-S474F</i> | <b>1000 (850-1300)</b>                          | <b>50</b>     | <b>92 (70-120)</b>                              | <b>84</b>     | <b>93 (80-120)</b>                              | <b>4.2</b>        |

<sup>a</sup>Mutation rates are given as the median of at least 18 independent cultures, with 95% confidence intervals in parentheses. Fold increase is shown relative to the wild-type diploid (WT). Bold text indicates  $p < 0.05$  by Wilcoxon-Mann-Whitney compared to WT. Data from this table were used to generate Figure 5.

<sup>b</sup>Strain contains two copies of the *lys2-InsE<sub>A14</sub>* allele (Supplementary Table 1). The fold increase shown is the fold increase in the Lys<sup>+</sup> reversion rate over wild-type divided by two.

**Table S7 Spontaneous mutation rates in yeast strains with *pol2-R252H*, *-R778W* and *-A979V* mutations in MMR-proficient or MMR-deficient (*mlh1Δ*) background**

| Ploidy    | <i>POL2</i> allele     | <i>MLH1</i> allele | Can <sup>R</sup> mutation                       |               | His <sup>+</sup> reversion                      |               | Lys <sup>+</sup> reversion                      |               |
|-----------|------------------------|--------------------|-------------------------------------------------|---------------|-------------------------------------------------|---------------|-------------------------------------------------|---------------|
|           |                        |                    | Mutation rate (x10 <sup>-8</sup> ) <sup>a</sup> | Fold increase | Mutation rate (x10 <sup>-8</sup> ) <sup>a</sup> | Fold increase | Mutation rate (x10 <sup>-8</sup> ) <sup>a</sup> | Fold increase |
| <i>n</i>  | <i>POL2</i>            | <i>MLH1</i>        | 15 (14-20)                                      | 1.0           | 0.92 (0.64-1.3)                                 | 1.0           | 26 (18-30)                                      | 1.0           |
|           | <i>pol2-R252H</i>      | <i>MLH1</i>        | 23 (15-31)                                      | 1.5           | 0.90 (0.69-2.1)                                 | 0.98          | 32 (28-34)                                      | 1.2           |
|           | <i>pol2-R778W</i>      | <i>MLH1</i>        | 15 (13-19)                                      | 1.0           | 0.59 (0.48-0.73)                                | 0.64          | 14 (14-15)                                      | 0.54          |
|           | <i>pol2-A979V</i>      | <i>MLH1</i>        | 17 (13-34)                                      | 1.1           | 0.93 (0.65-1.2)                                 | 1.0           | 21 (18-24)                                      | 0.81          |
|           | <i>POL2</i>            | <i>mlh1Δ</i>       | 440 (380-490)                                   | 29            | 97 (57-110)                                     | 110           | 130000 (120000-170000)                          | 5000          |
|           | <i>pol2-R252H</i>      | <i>mlh1Δ</i>       | <b>970 (930-1100)</b>                           | <b>65</b>     | <b>150 (140-160)</b>                            | <b>160</b>    | 160000 (140000-260000)                          | 6200          |
|           | <i>pol2-R778W</i>      | <i>mlh1Δ</i>       | 530 (440-650)                                   | 35            | 100 (91-110)                                    | 110           | 140000 (130000-160000)                          | 5400          |
|           | <i>pol2-A979V</i>      | <i>mlh1Δ</i>       | 410 (390-470)                                   | 27            | 99 (90-110)                                     | 110           | 170000 (140000-190000)                          | 6500          |
| <i>2n</i> | <i>POL2/POL2</i>       | <i>MLH1/MLH1</i>   | 17 (16-23)                                      | 1.0           | 1.2 (0.87-1.6)                                  | 1.0           | 18 (16-22)                                      | 1.0           |
|           | <i>pol2-R252H/POL2</i> | <i>MLH1/MLH1</i>   | 18 (15-21)                                      | 1.1           | 1.2 (1.0-1.7)                                   | 1.0           | 20 (17-24)                                      | 1.1           |
|           | <i>POL2/POL2</i>       | <i>mlh1Δ/mlh1Δ</i> | 450 (410-520)                                   | 26            | 110 (98-140)                                    | 92            | 120000 (100000-130000)                          | 6700          |
|           | <i>pol2-R252H/POL2</i> | <i>mlh1Δ/mlh1Δ</i> | <b>820 (710-1200)</b>                           | <b>48</b>     | <b>150 (140-170)</b>                            | <b>130</b>    | 140000 (120000-160000)                          | 7800          |

<sup>a</sup>Mutation rates are given as the median of at least 18 independent cultures, with 95% confidence intervals in parentheses. Fold increase is shown relative to the wild-type haploid or diploid. Bold text indicates  $p < 0.05$  by Wilcoxon-Mann-Whitney compared to *mlh1Δ* haploids or *mlh1Δ/mlh1Δ* diploids. Data from this table were used to generate Figure 6.

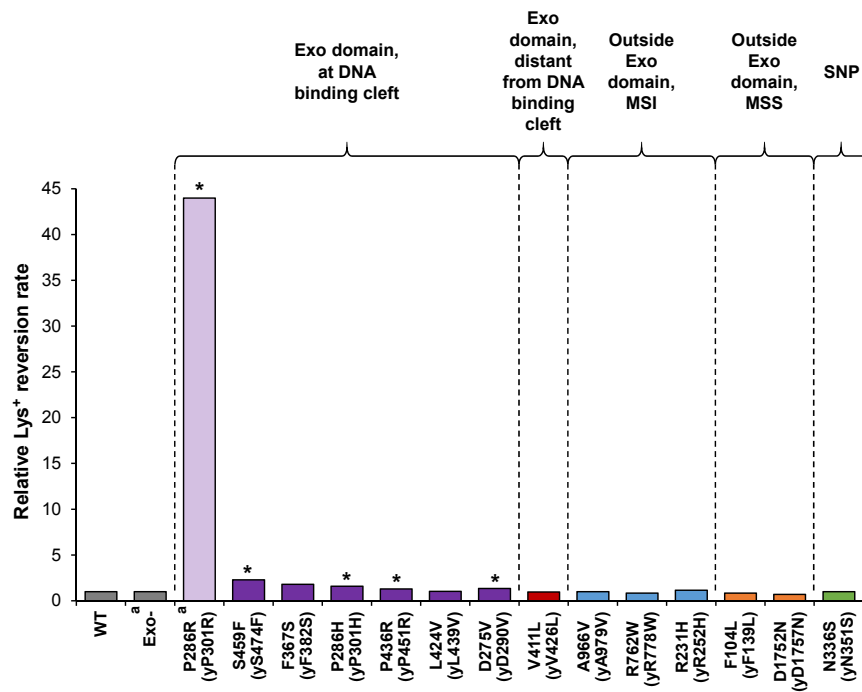

**Figure S1** Effect of cancer-associated Polε variants on the rate of *lys2-InsE<sub>A14</sub>* reversion in haploid yeast strains. Relative mutation rates are shown compared to wild-type (WT). All experimental details and symbols are as in Figure 2. Asterisks indicate  $p < 0.05$  by Wilcoxon-Mann-Whitney compared to WT. Data are from Supplementary Table S3. <sup>a</sup>Data from Kane and Shcherbakova 2014.

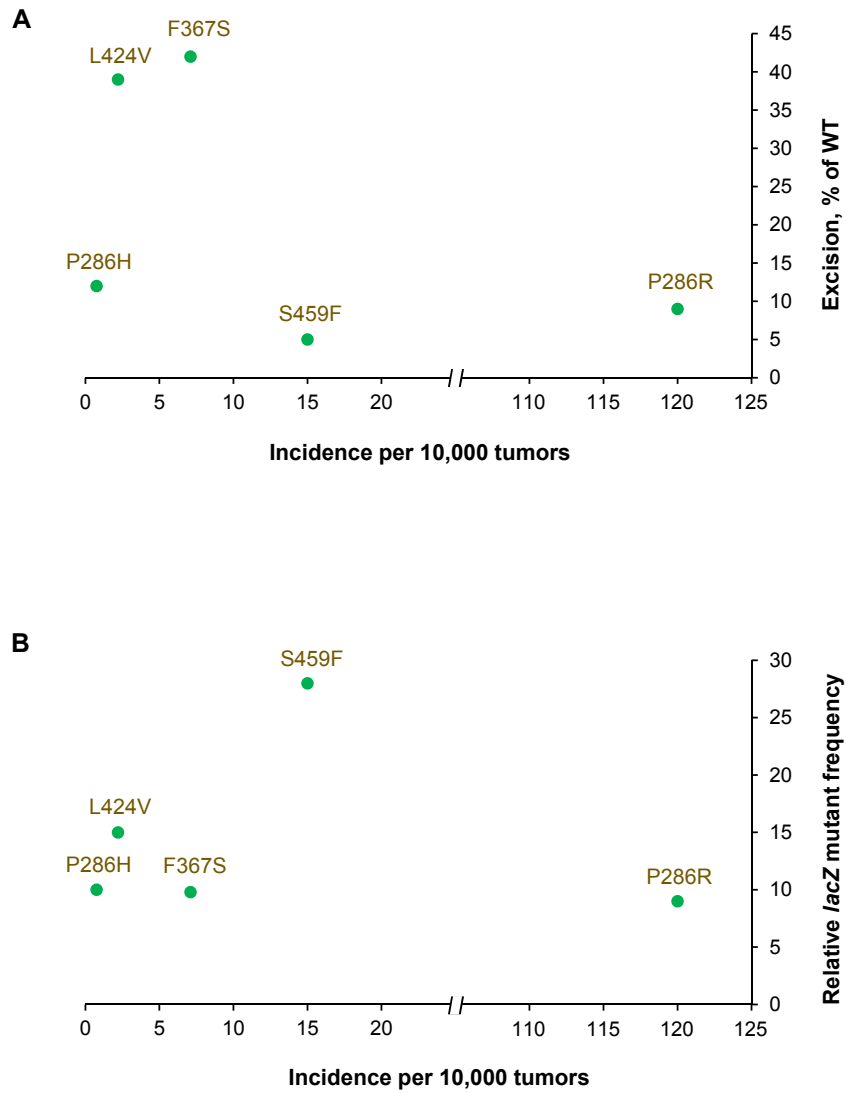

**Figure S2** Lack of correlation between *in vitro* effects of Pole mutations and their frequency in tumors. [A] Relationship between exonuclease activity defect and variant frequency. [B] Relationship between *in vitro* error rate and variant frequency. Exonuclease activity and *in vitro* error rates were measured in Shinbrot *et al.* 2014 using the N-terminal fragment of human Pole containing the exonuclease and DNA polymerase domains. The variant frequency in tumors was determined as described in Figure 4.

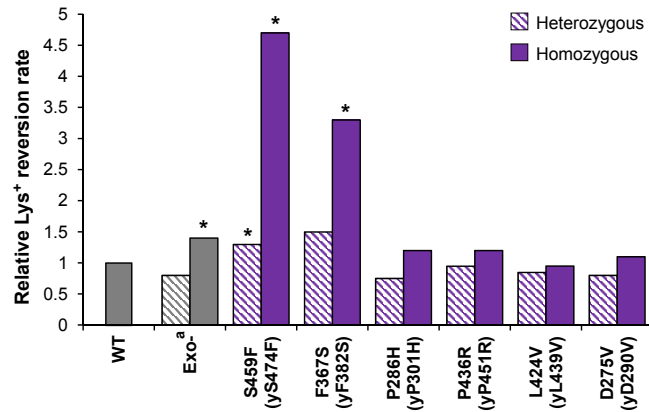

**Figure S3** Effect of cancer-associated Pol $\epsilon$  variants on the rate of *lys2-InsE<sub>A14</sub>* reversion in diploid yeast strains. The strains contained one copy of the *lys2-InsE<sub>A14</sub>* reporter allele and a nonreversible mutation at the same position of the *LYS2* gene in the homologous chromosome. All other experimental details and symbols are as in Figure 5. Relative mutation rates are shown compared to wild-type (WT). Asterisks indicate  $p < 0.05$  by Wilcoxon-Mann-Whitney compared to WT. Data are from Supplementary Table S6. <sup>a</sup>Data from Kane and Shcherbakova 2014.

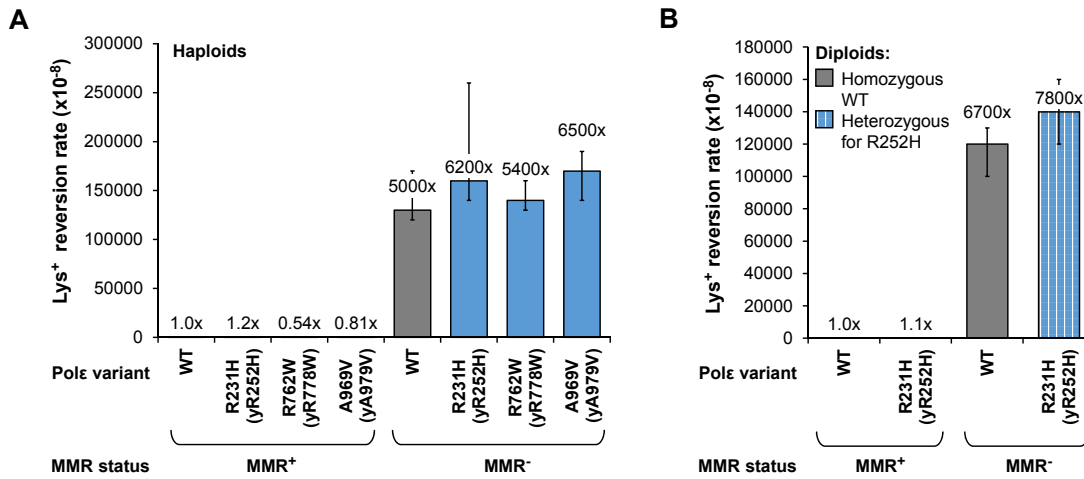

**Figure S4** PolE variants found in MMR-deficient tumors do not affect the rate of *lys2-InsE<sub>A14</sub>* reversion in MMR-proficient or MMR-deficient background. The reversion rate was measured in haploid [A] or diploid [B] yeast strains containing indicated chromosomal *pol2* mutations. The MMR defect was mimicked by deleting the yeast *MLH1* gene. Mutation rates are given as the median for at least 18 independent cultures, with error bars indicating 95% confidence intervals. Fold increase in mutation rate relative to the strain with wild-type *POL2* and *MLH1* genes is shown above each bar. Data are from Supplementary Table S7.
